# Supplementary material
Source: Springer Nature journal article supplement (https://www.springermedizin.de/resource/supplementary/13046_2010_348_MOESM1_ESM.pdf/9661828)

# SULT1A1 R213H with breast cancer risk

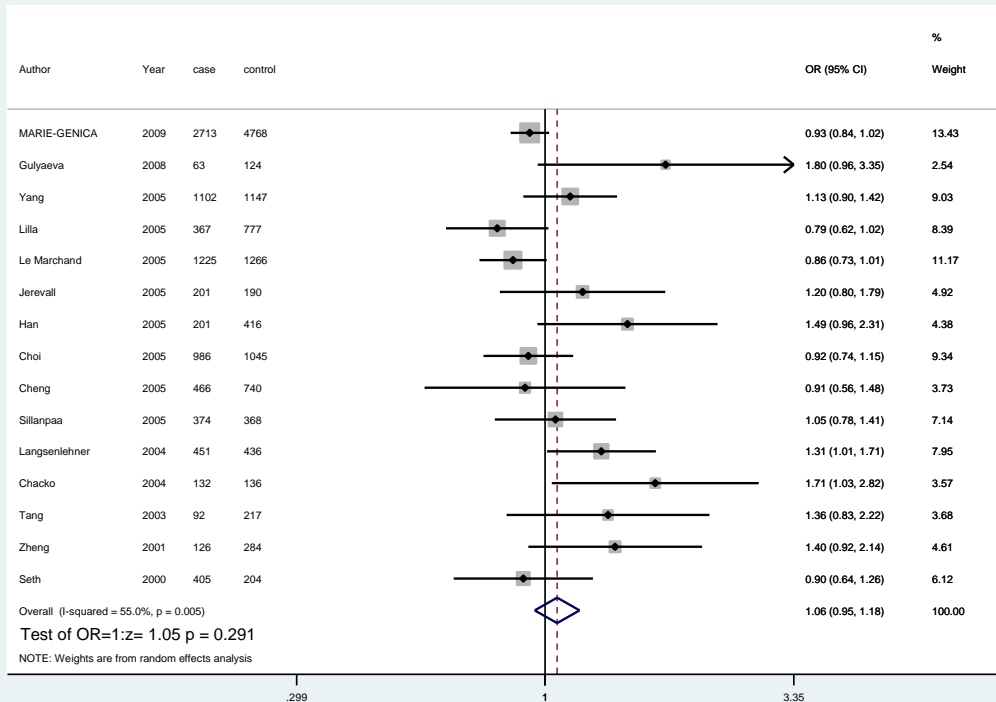

Supplement: MOESM1 [file 9661828]
